# Supplementary material for: Insights into the Microstructural Evolution Occurring during Pyrolysis of Metal-Modified Ceramers Studied through Selective SiO2 Removal
Source: MDPI journal article supplement (doi:10.3390/ma14123276), 2021-06-14
Supplement: s1 [file s1]

Supplementary Material

# Insights into the Microstructural Evolution Occurring during Pyrolysis of Metal-Modified Ceramers Studied through Selective SiO<sub>2</sub> Removal

Aitana Tamayo <sup>1,\*</sup>, Juan Rubio <sup>1</sup>, Fausto Rubio <sup>1</sup> and M<sup>a</sup> Angeles Rodriguez <sup>2</sup>

<sup>1</sup> Department. of Physical Chemistry of Surfaces and Processes, Institute of Ceramics and Glass, CSIC. Kelsen 5, 28049 Madrid, Spain; jrubio@icv.csic.es (J.R.); frubio@icv.csic.es (F.R.)

<sup>2</sup> Department. Of Environmental Sciences, Faculty of Sciences, University of Extremadura, Avda. Elvas s/n, 06071 Badajoz, Spain; marodgon@unex.es

\* Correspondence: aitanath@icv.csic.es; Tel.: +34-91-735-5840

**Citation:** Tamayo, A.; Rubio, J.; Rubio, F.; Rodríguez, M<sup>a</sup>.A. Insights into the Microstructural Evolution Occurring during Pyrolysis of Metal-Modified Ceramers Studied through Selective SiO<sub>2</sub> Removal. *Materials* **2021**, *14*, x. <https://doi.org/10.3390/xxxxx>

Academic Editor(s): Juergen Stampfl

Received: 17 May 2021

Accepted: 11 June 2021

Published: 14 June 2021

**Publisher's Note:** MDPI stays neutral with regard to jurisdictional claims in published maps and institutional affiliations.

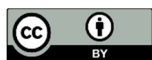

**Copyright:** © 2021 by the authors. Submitted for possible open access publication under the terms and conditions of the Creative Commons Attribution (CC BY) license (<http://creativecommons.org/licenses/by/4.0/>).

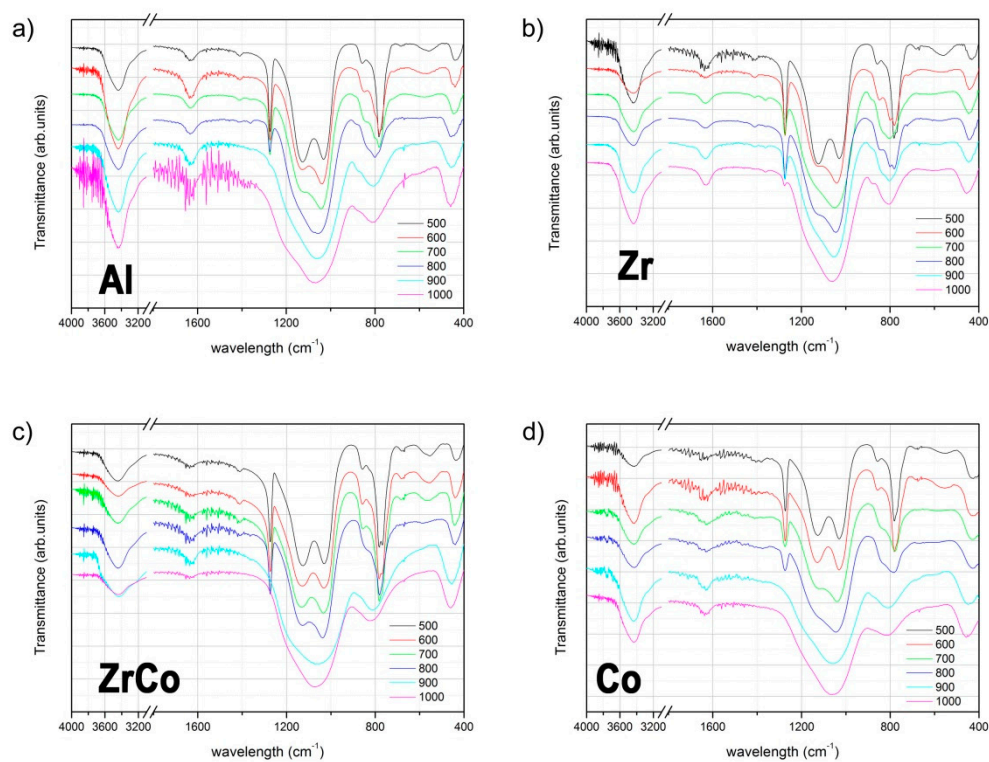

**Figure S1.** Infrared spectra of the samples pyrolyzed at different temperatures and containing the heteroatoms: (a) Aluminum; (b) Zirconium; (c) Zirconium plus Cobalt; (d) Cobalt.

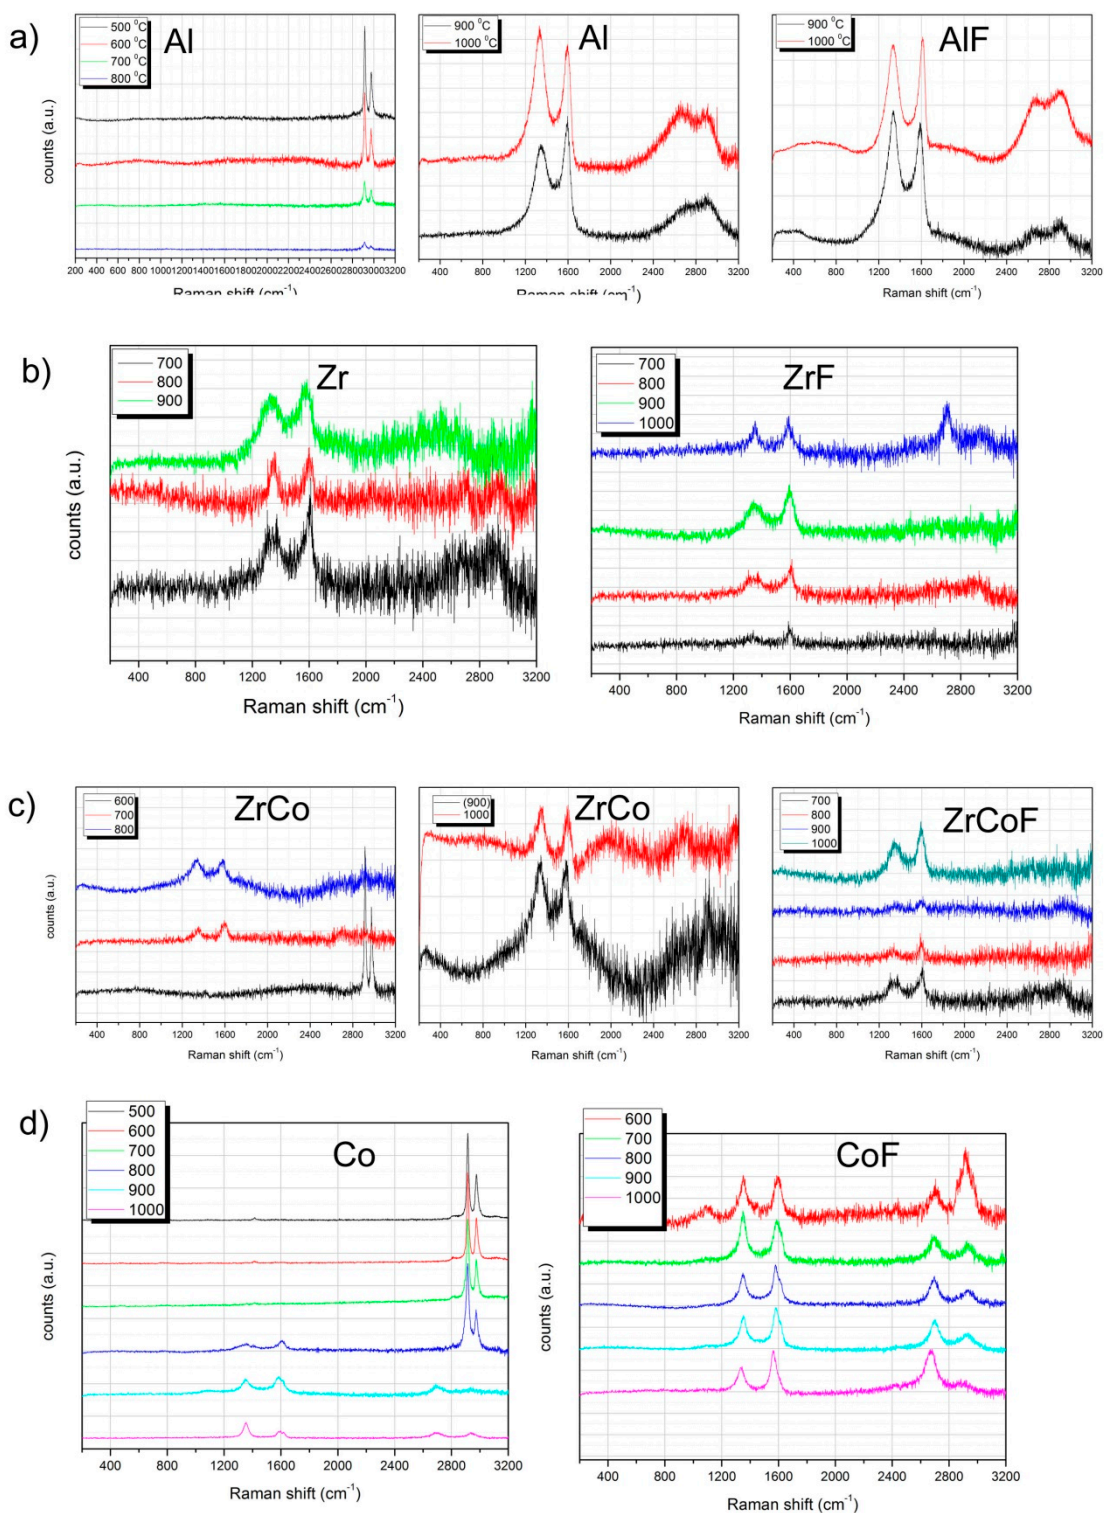

**Figure S2.** Raman spectra of the pyrolyzed and HF-etched samples and containing the heteroatoms: (a) Aluminum; (b) Zirconium; (c) Zirconium plus Cobalt; (d) Cobalt.

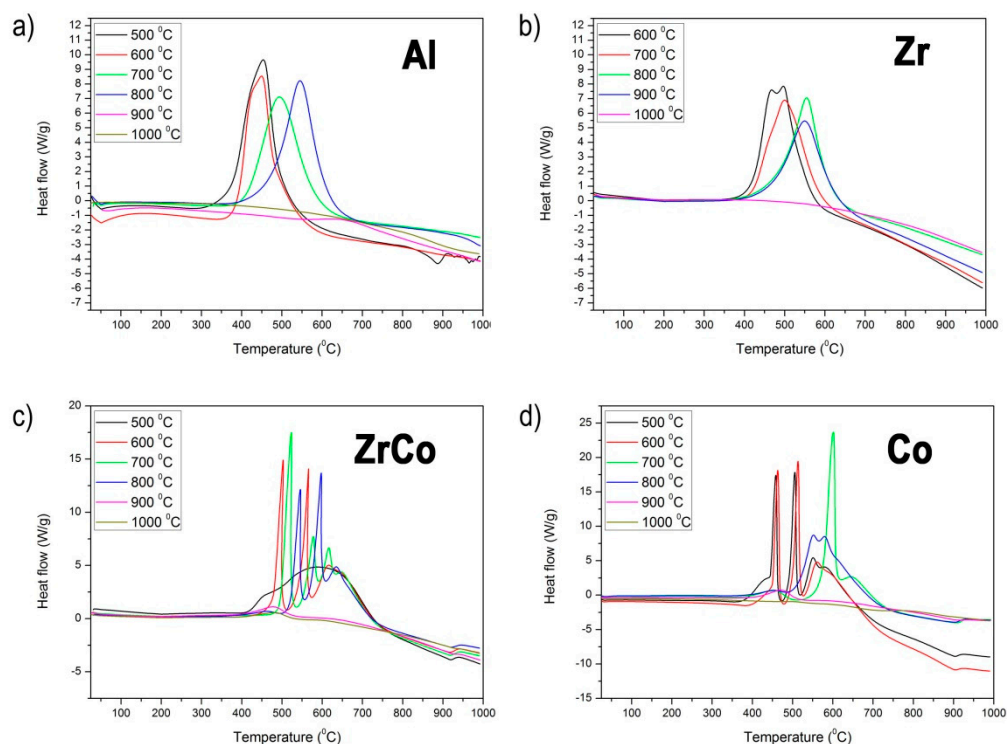

**Figure S3.** Differential scanning calorimetry curves of the pyrolyzed materials and containing the heteroatoms: (a) Aluminum; (b) Zirconium; (c) Zirconium plus Cobalt; (d) Cobalt.

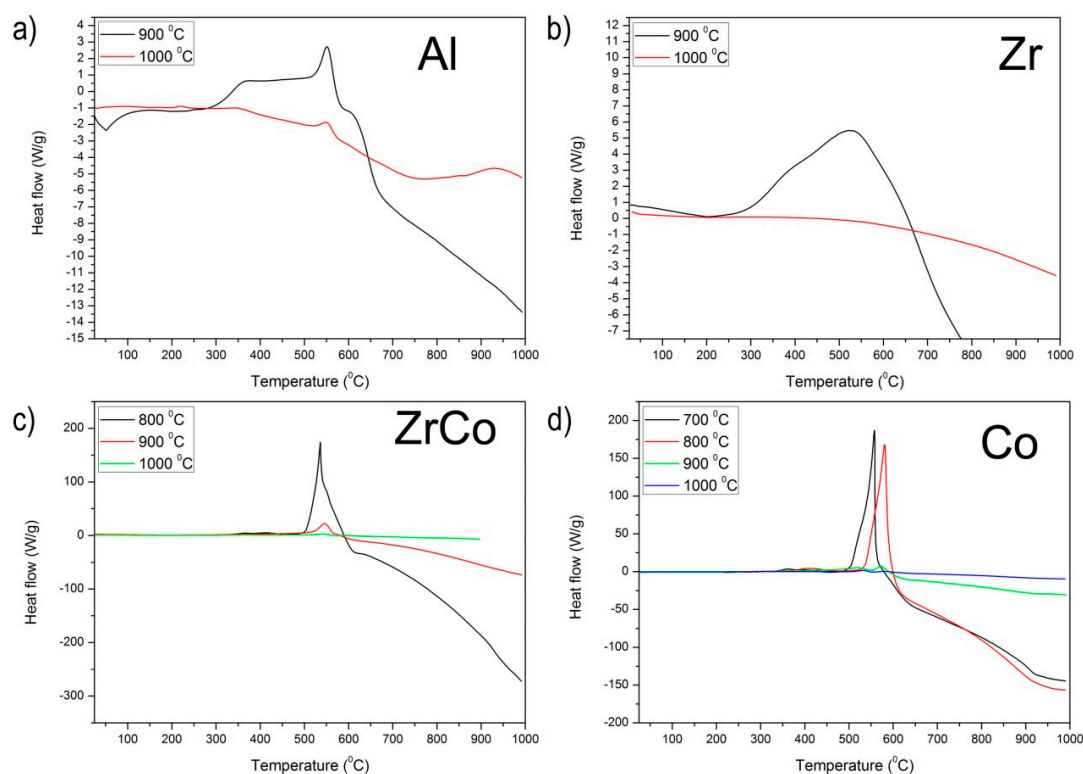

**Figure S4.** Differential scanning calorimetry curves of the HF-etched samples and containing the heteroatoms: (a) Aluminum; (b) Zirconium; (c) Zirconium plus Cobalt; (d) Cobalt.

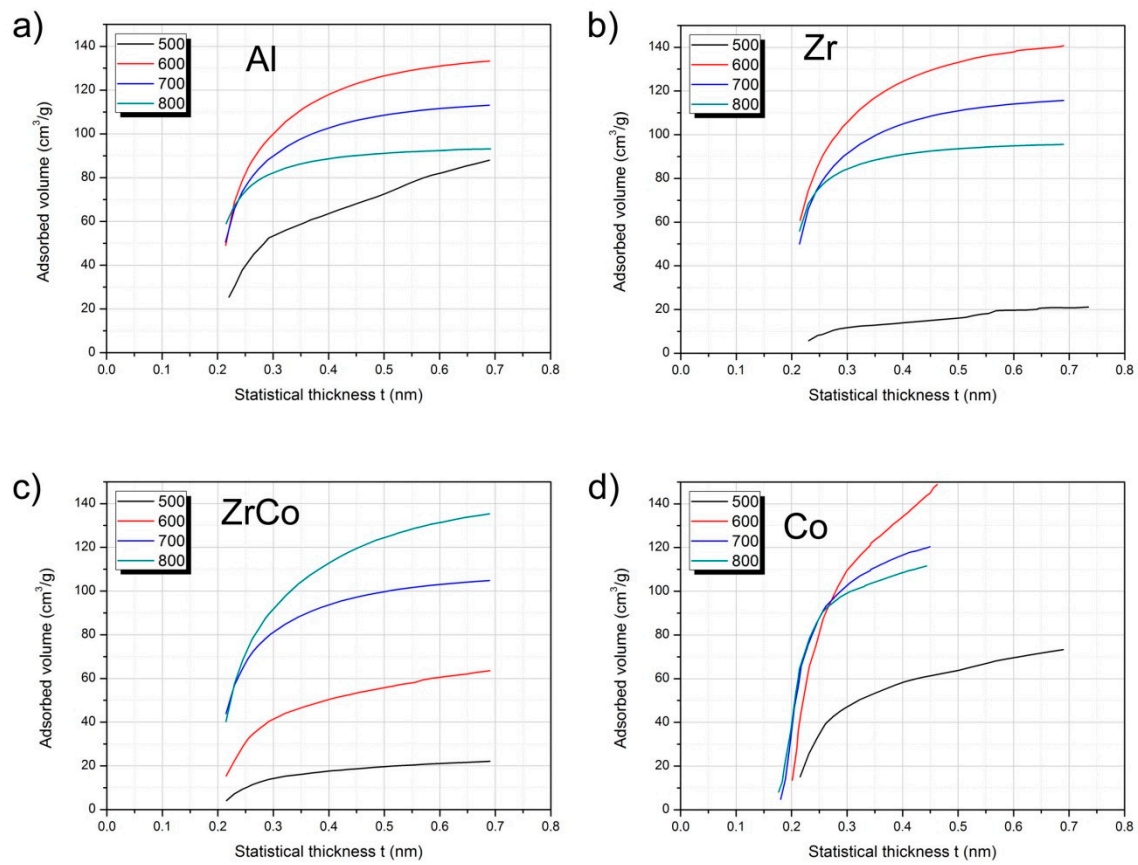

**Figure S5.**  $t$ -plots obtained from the nitrogen adsorption isotherms of the pyrolyzed materials and containing the heteroatoms: (a) Aluminum; (b) Zirconium; (c) Zirconium plus Cobalt; (d) Cobalt.

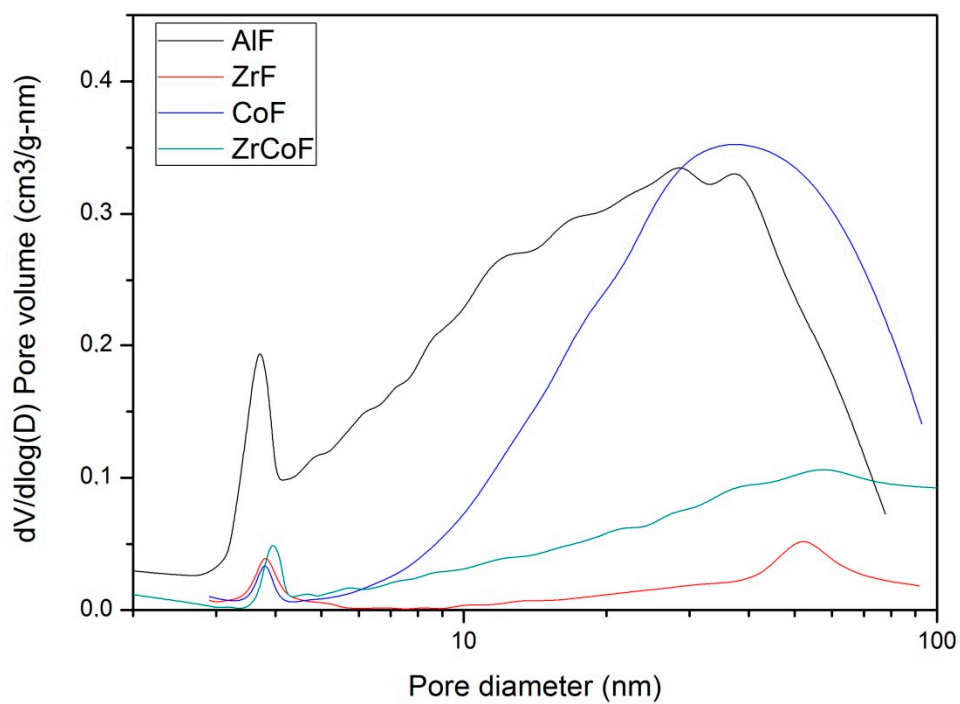

Figure S6. BJH Pore size distributions of the HF-etched samples.

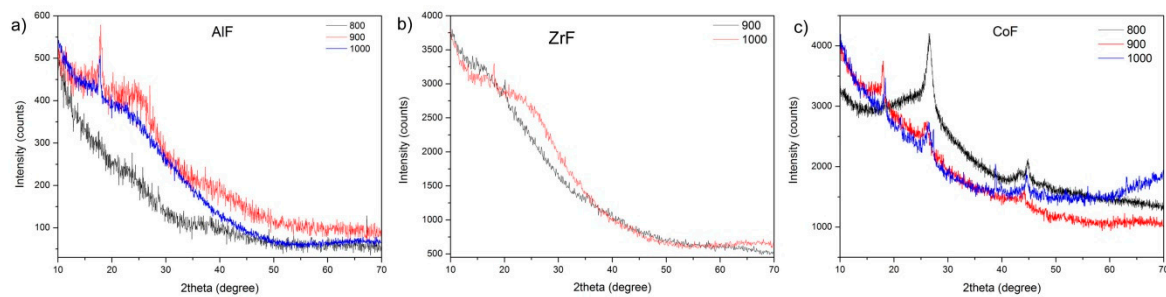

Figure S7. XRD patterns of the HF-etched materials and containing the heteroatoms: (a) Aluminum; (b) Zirconium; (c) Cobalt.
